# Supplementary material for: Endolysin NC5 improves early cloxacillin treatment in a mouse model of Streptococcus uberis mastitis
Source: Springer Nature journal article supplement (doi:10.1007/s00253-023-12820-w), 2024-01-10

## Supplementary materials

**Journal Name:** Applied Microbiology and Biotechnology

**Manuscript Title:** Endolysin NC5 improves early cloxacillin treatment in a mouse model of *Streptococcus uberis* mastitis

**Authors:** Niels Vander Elst<sup>1,2,3,\*</sup>, Julie Bellemans<sup>2,3</sup>, Rob Lavigne<sup>1</sup>, Yves Briers<sup>2</sup> and Evelyne Meyer<sup>3,#</sup>

<sup>1</sup>Laboratory of Gene Technology, Department of Biosystems, Faculty of Bioscience Engineering, KU Leuven, Kasteelpark Arenberg 21, 3001 Heverlee, Belgium.

<sup>2</sup>Laboratory of Applied Biotechnology, Department of Biotechnology, Faculty of Bioscience Engineering, Ghent University, Valentin Vaerwyckweg 1, 9000 Gent, Belgium.

<sup>3</sup>Laboratory of Biochemistry, Department of Veterinary and Biosciences, Faculty of Veterinary Medicine, Ghent University, Salisburylaan 133, 9820 Merelbeke, Belgium.

\*E-mail address of the corresponding author: [Niels.VanderElst@ugent.be](mailto:Niels.VanderElst@ugent.be) and [niels.vander.elst@ki.se](mailto:niels.vander.elst@ki.se); telephone number of the corresponding author: +32 494 90 10 64.

**Figure S1.** Histopathological sections of murine mammary glands stained for Ly6G (neutrophils) in response to the intraductal inoculation with approximately  $10^3$  CFU of a clinical bovine mastitis-derived *S. uberis* isolate. Mammary glands were harvested 8, 12 and 24 h post-infection (p.i.). Pictures were captured at a 40 $\times$  magnification, showcasing mammary glands of different mice. A scale bar, denoting 20  $\mu$ m, provides a reference for measurement.

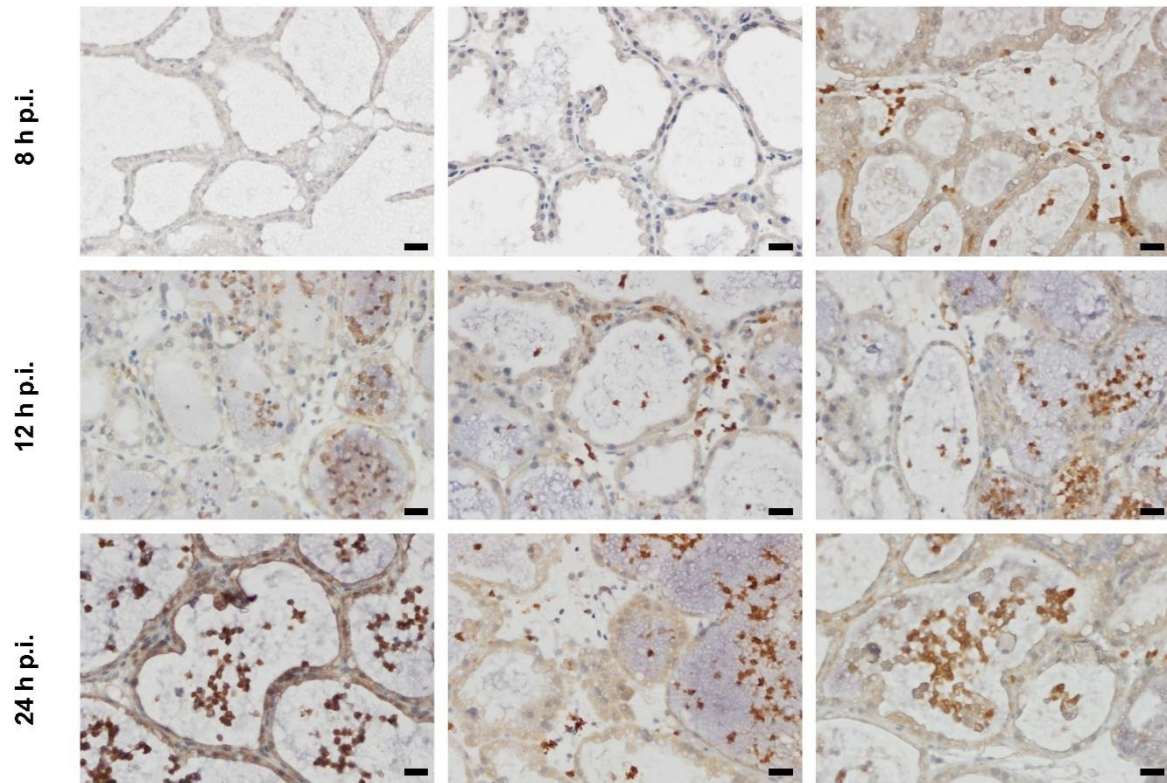

**Figure S2.** Histopathological sections of murine mammary glands stained for the polyhistidine tag of the endolysin after an intraductal inoculation with either 235.0  $\mu\text{g}$  NC5 or endolysin buffer (phosphate buffered saline, PBS). Mammary glands were harvested 1 h post-inoculation. Pictures were captured at a 40 $\times$  magnification, showcasing mammary glands of different mice. A scale bar, denoting 20  $\mu\text{m}$ , provides a reference for measurement.

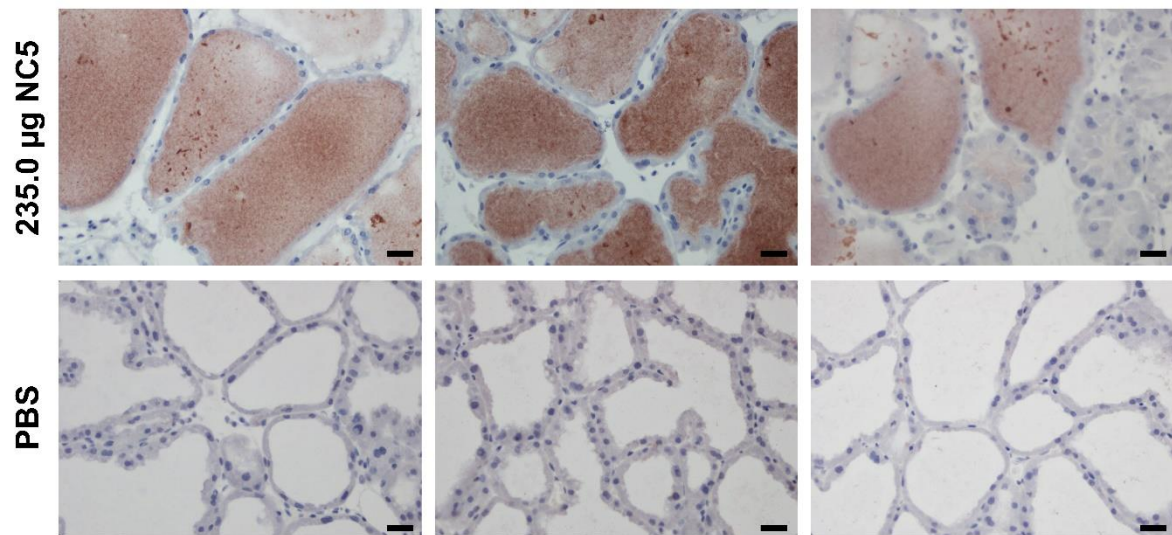

**Figure S3.** Histopathological sections and quantification of murine mammary glands stained for Ly6G (neutrophils) in response to the intraductal inoculation with approximately  $10^3$  CFU *S. uberis* and treatment administered 12 h post-infection, consisting of either placebo (PBS), 30.0  $\mu$ g cloxacillin as stand-alone antibiotic therapy, and addition of NC5 in a low (23.5  $\mu$ g) and high (235.0  $\mu$ g) dose to 30.0  $\mu$ g cloxacillin as a combination therapy. Pictures were captured at a 40 $\times$  magnification, showcasing mammary glands of different mice. A scale bar, denoting 20  $\mu$ m, provides a reference for measurement.

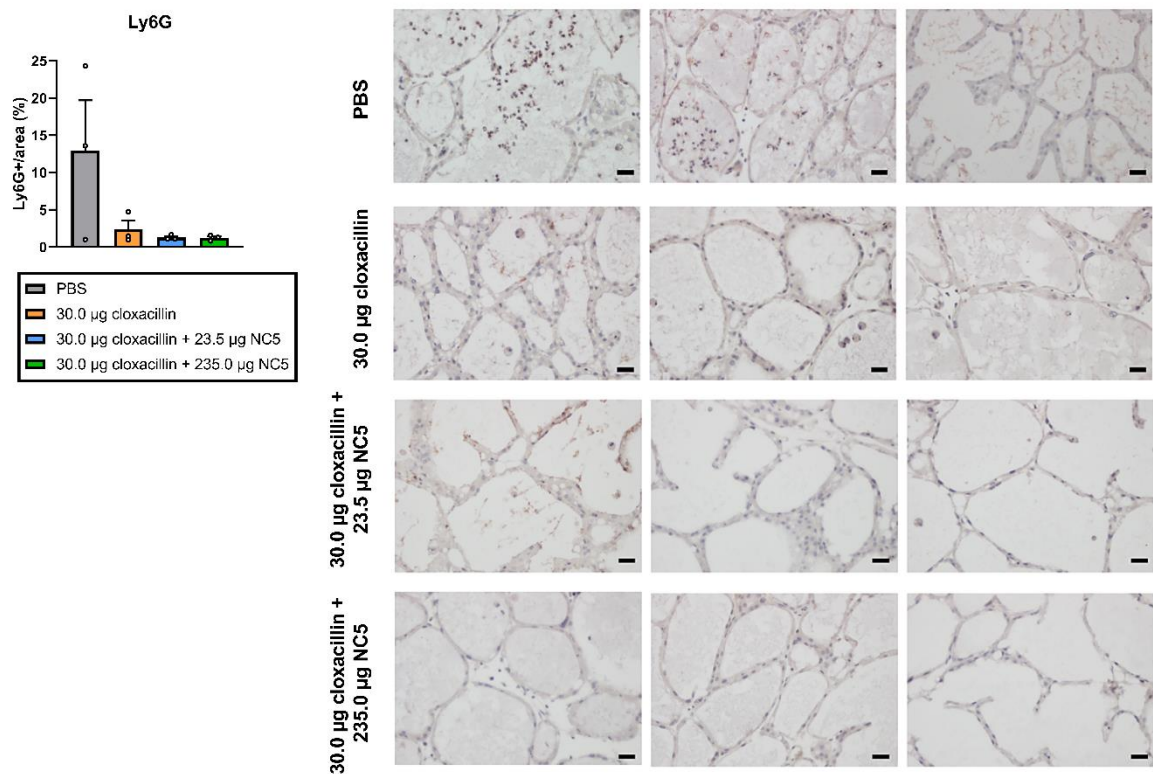

**Figure S4.** Comparative evaluation of the inflammatory protein profile between the different treatment groups of this study after exclusion of the slow-responding mice. Data are shown as individual points representing each mouse with a bar indicating the mean and an error bar representing the standard error of the mean. One mouse in the group that received 30.0 µg cloxacillin supplemented with 235.0 µg NC5 consistently had outliers and was removed from the dataset. A single (\*) asterisk indicates  $p < 0.05$ .

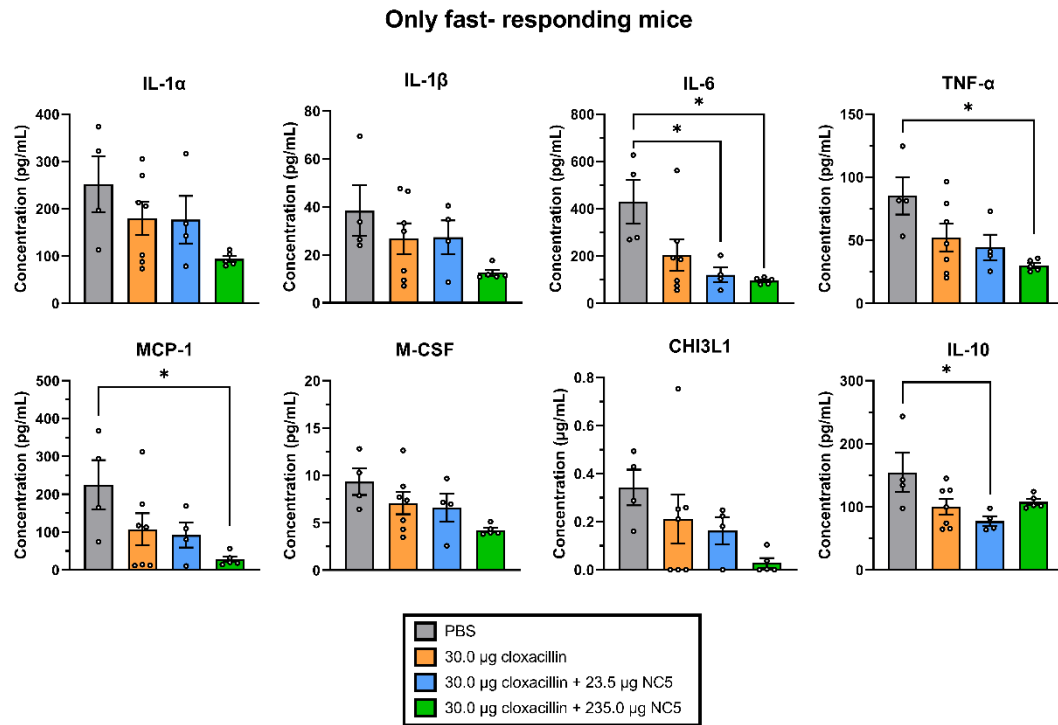



**Figure S5.** Histopathological sections and quantification of murine mammary glands stained for Iba-1 (macrophages) in response to an intraductal inoculation with  $10^3$  CFU *S. uberis* and treatment administered 12 h post-infection, consisting of either placebo (PBS), 30.0  $\mu$ g cloxacillin as stand-alone antibiotic therapy, and NC5 in a low (23.5  $\mu$ g) and high (235.0  $\mu$ g) dose to 30.0  $\mu$ g cloxacillin as a combination therapy. Pictures were captured at a 40 $\times$  magnification, showcasing mammary glands of different mice. A scale bar, denoting 20  $\mu$ m, provides a reference for measurement.

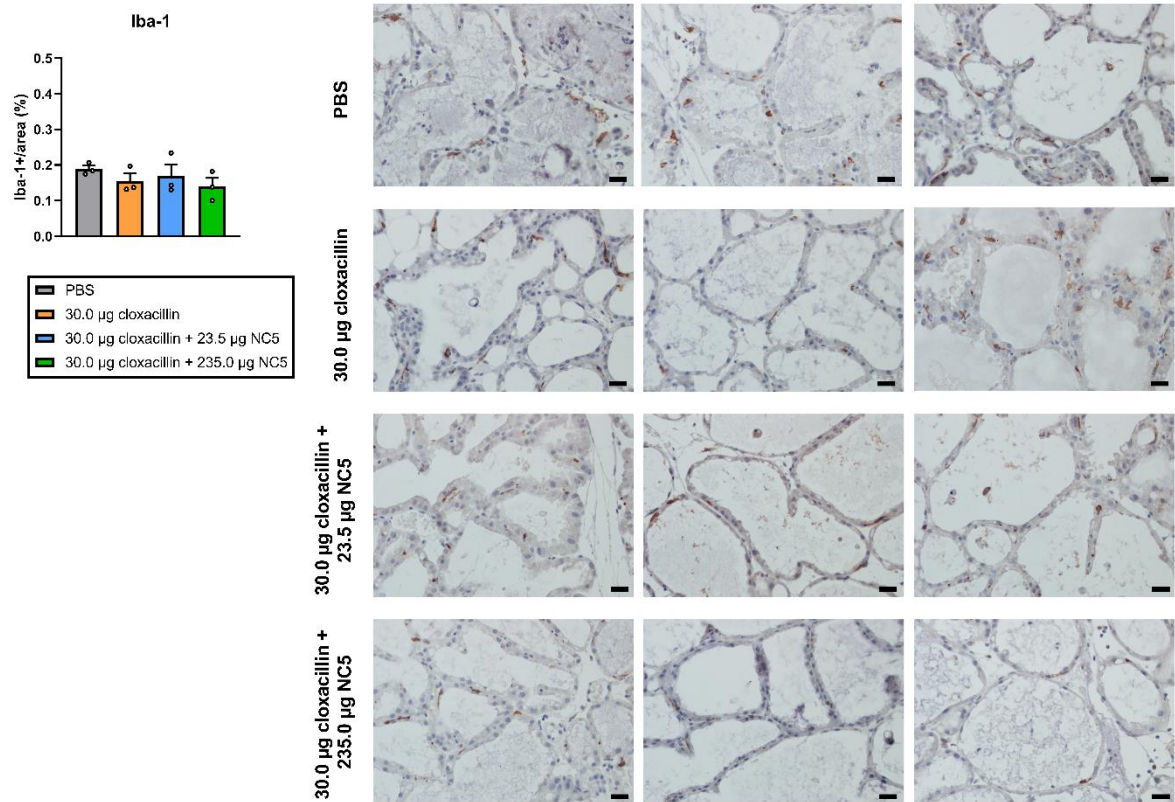

Supplement: MOESM1 [file 253_2023_12820_MOESM1_ESM.pdf]
